# Supplementary material for: Improving long-read consensus sequencing accuracy with deep learning
Source: bioRxiv or medRxiv preprint supplement (doi:10.1101/2021.06.28.450238), 2021-09-10
Supplement: Supplementary file [file media-1.pdf]

## Supplementary Material for

# Improving long-read consensus sequencing accuracy with deep learning

Avantika Lal<sup>1</sup>, Michael Brown<sup>2</sup>, Rahul Mohan<sup>1,3</sup>, Joyjit Daw<sup>1</sup>, James Drake<sup>2</sup>, Johnny Israeli<sup>1</sup>

<sup>1</sup> NVIDIA Corporation, Santa Clara, CA 95051, USA

<sup>2</sup> Pacific Biosciences, Menlo Park, CA 94025, USA

<sup>3</sup> Department of Computer Science, University of Southern California, Los Angeles, CA 90089, USA

|                                        | <b>Train</b>                       | <b>Validation</b> | <b>Test</b> |
|----------------------------------------|------------------------------------|-------------------|-------------|
| <b>Chromosomes</b>                     | All autosomes except 6, 11, 14, 20 | 11                | 6, 14, 20   |
| <b>Consensus reads</b>                 | 22315                              | 1220              | 3799        |
| <b>Subreads</b>                        | 325062                             | 18479             | 53222       |
| <b>Subreads per HiFi read (mean)</b>   | 14.6                               | 15.1              | 14.0        |
| <b>Subreads per HiFi read (median)</b> | 13                                 | 13                | 13          |
| <b>HiFi read length (mean)</b>         | 13042.5                            | 13052.2           | 13114.8     |
| <b>HiFi read length (median)</b>       | 13102.0                            | 13081.5           | 13119.0     |
| <b>HiFi read accuracy (mean)</b>       | 99.7445                            | 99.7493           | 99.7491     |
| <b>HiFi read accuracy (median)</b>     | 99.8767                            | 99.8799           | 99.8746     |
| <b>HiFi read errors (mean)</b>         | 32.4051                            | 32.6147           | 32.9039     |
| <b>HiFi read errors (median)</b>       | 16                                 | 15                | 16          |

**Supplementary Table 1: Summary of Sequel HG002 training, validation and test sets.**

Number of errors was measured as the edit distance between the HiFi read sequence and the true genome sequence. Read accuracy was measured as  $(1 - (\text{number of errors}/\text{read length}))$ .

| Model type      | Hyperparameters                                                                                  | Data Encoding                 | Parameters     | Validation loss  | Training time   |
|-----------------|--------------------------------------------------------------------------------------------------|-------------------------------|----------------|------------------|-----------------|
| GRU             | layers = 1, hidden units = 64                                                                    | Default                       | 32133          | 0.0036354        | 03:49:21        |
| GRU             | layers = 2, hidden units = 64                                                                    | Default                       | 106629         | 0.0033968        | 06:09:22        |
| GRU             | layers = 1, hidden units = 128                                                                   | Default                       | 113413         | 0.0035039        | 04:23:54        |
| <b>GRU</b>      | <b>layers = 2, hidden units = 128</b>                                                            | <b>Default</b>                | <b>409861</b>  | <b>0.0032141</b> | <b>10:13:31</b> |
| <b>GRU</b>      | <b>Layers = 2, hidden units = 256</b>                                                            | <b>Default</b>                | <b>1606149</b> | <b>0.0031371</b> | <b>19:46:16</b> |
| Conv-GRU        | Conv layers = 1, kernel width = 3, channels = 128, GRU layers = 1, GRU hidden units = 128        | Default                       | 205701         | 0.0033022        | 05:34:33        |
| Conv-GRU        | Conv layers = 2, kernel width = 3, channels = 128, GRU layers = 1, GRU hidden units = 128        | Default                       | 254981         | 0.0032350        | 06:01:01        |
| Conv-GRU        | Conv layers = 1, kernel width = 3, channels = 256, GRU layers = 1, GRU hidden units = 128        | Default                       | 310277         | 0.0032968        | 07:28:23        |
| <b>Conv-GRU</b> | <b>Conv layers = 2, kernel width = 3, channels = 256, GRU layers = 1, GRU hidden units = 128</b> | <b>Default</b>                | <b>507141</b>  | <b>0.0031721</b> | <b>08:46:49</b> |
| Conv-GRU        | Conv layers = 2, kernel width = 3, channels = 256, GRU layers = 1, GRU hidden units = 128        | Normalized counts             | 507141         | 0.0032584        | 08:49:28        |
| Conv-GRU        | Conv layers = 2, kernel width = 3, channels = 256, GRU layers = 1, GRU hidden units = 128        | No HiFi read + quality scores | 502533         | 0.0034818        | 08:41:41        |
| Conv-GRU        | Conv layers = 1, kernel width = 3, channels = 128, GRU layers = 1, GRU hidden units = 256        | Default                       | 601733         | 0.0032411        | 10:11:15        |
| Conv-GRU        | Conv layers = 2, kernel width = 3, channels = 128, GRU layers = 1, GRU hidden units = 256        | Default                       | 651013         | 0.0032442        | 10:24:41        |
| Conv-GRU        | Conv layers = 1, kernel width = 3, channels = 256, GRU layers = 1, GRU hidden units = 256        | Default                       | 804613         | 0.0032170        | 11:27:28        |
| Conv-GRU        | Conv layers = 2, kernel width = 3, channels = 256, GRU layers = 1, GRU hidden units = 256        | Default                       | 1001477        | 0.0031835        | 12:37:38        |

**Supplementary Table 2:** Comparison of model architectures and encodings on the Sequel HG002 validation set.

| Type      | Base | Length | Frequency (Unpolished reads) | Frequency (polished reads) | Ratio |
|-----------|------|--------|------------------------------|----------------------------|-------|
| Insertion | A    | 1      | 2021                         | 1317                       | 0.65  |
| Insertion | A    | 2      | 1401                         | 1153                       | 0.82  |
| Insertion | A    | 3      | 1443                         | 1171                       | 0.81  |
| Insertion | A    | 4      | 1242                         | 883                        | 0.71  |
| Insertion | A    | 5      | 857                          | 526                        | 0.61  |
| Insertion | A    | 6      | 450                          | 285                        | 0.63  |
| Insertion | A    | 7      | 291                          | 175                        | 0.60  |
| Insertion | A    | 8      | 144                          | 94                         | 0.65  |
| Insertion | A    | 9      | 94                           | 61                         | 0.65  |
| Insertion | A    | 10     | 84                           | 54                         | 0.64  |
| Insertion | A    | 11     | 49                           | 37                         | 0.76  |
| Insertion | A    | 12     | 32                           | 27                         | 0.84  |
| Insertion | A    | 13     | 39                           | 27                         | 0.69  |
| Insertion | A    | 14     | 23                           | 14                         | 0.61  |
| Insertion | A    | 15     | 23                           | 23                         | 1.00  |
| Insertion | A    | 16     | 22                           | 15                         | 0.68  |
| Insertion | A    | 17     | 16                           | 13                         | 0.81  |
| Insertion | A    | 18     | 11                           | 8                          | 0.73  |
| Insertion | A    | 19     | 11                           | 6                          | 0.55  |
| Insertion | A    | 20     | 7                            | 5                          | 0.71  |
| Insertion | A    | 21     | 5                            | 4                          | 0.80  |
| Insertion | A    | 22     | 5                            | 5                          | 1.00  |
| Insertion | A    | 28     | 1                            | 1                          | 1.00  |
| Insertion | C    | 1      | 2319                         | 1565                       | 0.67  |
| Insertion | C    | 2      | 1847                         | 1175                       | 0.64  |
| Insertion | C    | 3      | 1280                         | 688                        | 0.54  |
| Insertion | C    | 4      | 773                          | 311                        | 0.40  |
| Insertion | C    | 5      | 324                          | 120                        | 0.37  |
| Insertion | C    | 6      | 95                           | 22                         | 0.23  |
| Insertion | C    | 7      | 20                           | 5                          | 0.25  |
| Insertion | C    | 8      | 5                            | 0                          | 0.00  |
| Insertion | C    | 9      | 4                            | 1                          | 0.25  |
| Insertion | C    | 10     | 1                            | 0                          | 0.00  |
| Insertion | C    | 11     | 1                            | 0                          | 0.00  |
| Insertion | G    | 1      | 2354                         | 1572                       | 0.67  |

|           |   |    |      |      |      |
|-----------|---|----|------|------|------|
| Insertion | G | 2  | 1902 | 1120 | 0.59 |
| Insertion | G | 3  | 1360 | 707  | 0.52 |
| Insertion | G | 4  | 851  | 344  | 0.40 |
| Insertion | G | 5  | 368  | 109  | 0.30 |
| Insertion | G | 6  | 93   | 20   | 0.22 |
| Insertion | G | 7  | 19   | 5    | 0.26 |
| Insertion | G | 8  | 8    | 4    | 0.50 |
| Insertion | G | 9  | 0    | 0    | NA   |
| Insertion | G | 10 | 2    | 0    | 0.00 |
| Insertion | T | 1  | 2118 | 1314 | 0.62 |
| Insertion | T | 2  | 1572 | 1166 | 0.74 |
| Insertion | T | 3  | 1414 | 1071 | 0.76 |
| Insertion | T | 4  | 1139 | 746  | 0.65 |
| Insertion | T | 5  | 870  | 480  | 0.55 |
| Insertion | T | 6  | 429  | 247  | 0.58 |
| Insertion | T | 7  | 286  | 175  | 0.61 |
| Insertion | T | 8  | 142  | 81   | 0.57 |
| Insertion | T | 9  | 109  | 69   | 0.63 |
| Insertion | T | 10 | 69   | 48   | 0.70 |
| Insertion | T | 11 | 47   | 35   | 0.74 |
| Insertion | T | 12 | 37   | 29   | 0.78 |
| Insertion | T | 13 | 26   | 21   | 0.81 |
| Insertion | T | 14 | 41   | 30   | 0.73 |
| Insertion | T | 15 | 21   | 12   | 0.57 |
| Insertion | T | 16 | 16   | 13   | 0.81 |
| Insertion | T | 17 | 17   | 12   | 0.71 |
| Insertion | T | 18 | 8    | 7    | 0.88 |
| Insertion | T | 19 | 5    | 4    | 0.80 |
| Insertion | T | 20 | 3    | 2    | 0.67 |
| Insertion | T | 21 | 3    | 3    | 1.00 |
| Insertion | T | 22 | 1    | 1    | 1.00 |
| Insertion | T | 23 | 1    | 1    | 1.00 |
| Insertion | T | 24 | 1    | 1    | 1.00 |
| Deletion  | A | 1  | 579  | 559  | 0.97 |
| Deletion  | A | 2  | 1724 | 1139 | 0.66 |
| Deletion  | A | 3  | 1972 | 1238 | 0.63 |
| Deletion  | A | 4  | 1745 | 1225 | 0.70 |

|          |   |    |      |      |      |
|----------|---|----|------|------|------|
| Deletion | A | 5  | 1026 | 826  | 0.81 |
| Deletion | A | 6  | 435  | 390  | 0.90 |
| Deletion | A | 7  | 239  | 249  | 1.04 |
| Deletion | A | 8  | 113  | 115  | 1.02 |
| Deletion | A | 9  | 76   | 78   | 1.03 |
| Deletion | A | 10 | 59   | 57   | 0.97 |
| Deletion | A | 11 | 52   | 51   | 0.98 |
| Deletion | A | 12 | 25   | 28   | 1.12 |
| Deletion | A | 13 | 36   | 36   | 1.00 |
| Deletion | A | 14 | 22   | 24   | 1.09 |
| Deletion | A | 15 | 34   | 32   | 0.94 |
| Deletion | A | 16 | 25   | 28   | 1.12 |
| Deletion | A | 17 | 14   | 11   | 0.79 |
| Deletion | A | 18 | 6    | 6    | 1.00 |
| Deletion | A | 19 | 10   | 9    | 0.90 |
| Deletion | A | 20 | 4    | 5    | 1.25 |
| Deletion | A | 21 | 5    | 5    | 1.00 |
| Deletion | A | 22 | 4    | 3    | 0.75 |
| Deletion | A | 28 | 1    | 1    | 1.00 |
| Deletion | C | 1  | 259  | 230  | 0.89 |
| Deletion | C | 2  | 2096 | 1468 | 0.70 |
| Deletion | C | 3  | 1693 | 1311 | 0.77 |
| Deletion | C | 4  | 857  | 809  | 0.94 |
| Deletion | C | 5  | 261  | 292  | 1.12 |
| Deletion | C | 6  | 56   | 79   | 1.41 |
| Deletion | C | 7  | 12   | 17   | 1.42 |
| Deletion | C | 8  | 2    | 3    | 1.50 |
| Deletion | C | 9  | 0    | 3    | NA   |
| Deletion | C | 10 | 0    | 2    | NA   |
| Deletion | C | 11 | 1    | 1    | 1.00 |
| Deletion | G | 1  | 211  | 211  | 1.00 |
| Deletion | G | 2  | 2038 | 1527 | 0.75 |
| Deletion | G | 3  | 1847 | 1494 | 0.81 |
| Deletion | G | 4  | 840  | 851  | 1.01 |
| Deletion | G | 5  | 297  | 347  | 1.17 |
| Deletion | G | 6  | 57   | 84   | 1.47 |
| Deletion | G | 7  | 6    | 15   | 2.50 |

|          |   |    |      |      |      |
|----------|---|----|------|------|------|
| Deletion | G | 8  | 2    | 8    | 4.00 |
| Deletion | G | 9  | 2    | 1    | 0.50 |
| Deletion | G | 10 | 1    | 2    | 2.00 |
| Deletion | T | 1  | 547  | 539  | 0.99 |
| Deletion | T | 2  | 1823 | 1364 | 0.75 |
| Deletion | T | 3  | 2014 | 1385 | 0.69 |
| Deletion | T | 4  | 1625 | 1236 | 0.76 |
| Deletion | T | 5  | 1003 | 837  | 0.83 |
| Deletion | T | 6  | 438  | 452  | 1.03 |
| Deletion | T | 7  | 235  | 262  | 1.11 |
| Deletion | T | 8  | 93   | 107  | 1.15 |
| Deletion | T | 9  | 70   | 83   | 1.19 |
| Deletion | T | 10 | 53   | 72   | 1.36 |
| Deletion | T | 11 | 43   | 52   | 1.21 |
| Deletion | T | 12 | 35   | 47   | 1.34 |
| Deletion | T | 13 | 25   | 31   | 1.24 |
| Deletion | T | 14 | 22   | 25   | 1.14 |
| Deletion | T | 15 | 26   | 28   | 1.08 |
| Deletion | T | 16 | 17   | 16   | 0.94 |
| Deletion | T | 17 | 13   | 17   | 1.31 |
| Deletion | T | 18 | 5    | 2    | 0.40 |
| Deletion | T | 19 | 5    | 4    | 0.80 |
| Deletion | T | 20 | 1    | 1    | 1.00 |
| Deletion | T | 21 | 3    | 4    | 1.33 |
| Deletion | T | 22 | 1    | 1    | 1.00 |
| Deletion | T | 23 | 1    | 2    | 2.00 |
| Deletion | T | 24 | 1    | 2    | 2.00 |

**Supplementary Table 3:** Breakdown of insertion and deletion errors in the Sequel II HG002 test set.

| Type      | Base | Length | Frequency (Unpolished reads) | Frequency (polished reads) | Ratio |
|-----------|------|--------|------------------------------|----------------------------|-------|
| Insertion | A    | 1      | 13693                        | 7211                       | 0.53  |
| Insertion | A    | 2      | 10206                        | 6247                       | 0.61  |
| Insertion | A    | 3      | 7309                         | 4679                       | 0.64  |
| Insertion | A    | 4      | 4482                         | 2564                       | 0.57  |
| Insertion | A    | 5      | 2926                         | 1645                       | 0.56  |
| Insertion | A    | 6      | 1297                         | 794                        | 0.61  |
| Insertion | A    | 7      | 386                          | 263                        | 0.68  |
| Insertion | A    | 8      | 92                           | 69                         | 0.75  |
| Insertion | A    | 9      | 12                           | 9                          | 0.75  |
| Insertion | C    | 1      | 20253                        | 13506                      | 0.67  |
| Insertion | C    | 2      | 21104                        | 12703                      | 0.60  |
| Insertion | C    | 3      | 9317                         | 4770                       | 0.51  |
| Insertion | C    | 4      | 2896                         | 1332                       | 0.46  |
| Insertion | C    | 5      | 744                          | 307                        | 0.41  |
| Insertion | C    | 6      | 135                          | 56                         | 0.41  |
| Insertion | C    | 7      | 25                           | 9                          | 0.36  |
| Insertion | C    | 8      | 2                            | 0                          | 0.00  |
| Insertion | C    | 10     | 1                            | 0                          | 0.00  |
| Insertion | G    | 1      | 20662                        | 13162                      | 0.64  |
| Insertion | G    | 2      | 21896                        | 11668                      | 0.53  |
| Insertion | G    | 3      | 9457                         | 4548                       | 0.48  |
| Insertion | G    | 4      | 3036                         | 1301                       | 0.43  |
| Insertion | G    | 5      | 747                          | 273                        | 0.37  |
| Insertion | G    | 6      | 123                          | 53                         | 0.43  |
| Insertion | G    | 7      | 27                           | 8                          | 0.30  |
| Insertion | G    | 8      | 8                            | 6                          | 0.75  |
| Insertion | G    | 9      | 1                            | 1                          | 1.00  |
| Insertion | T    | 1      | 14832                        | 7828                       | 0.53  |
| Insertion | T    | 2      | 10588                        | 6083                       | 0.57  |
| Insertion | T    | 3      | 7391                         | 4182                       | 0.57  |
| Insertion | T    | 4      | 4393                         | 2120                       | 0.48  |
| Insertion | T    | 5      | 2915                         | 1357                       | 0.47  |
| Insertion | T    | 6      | 1225                         | 591                        | 0.48  |
| Insertion | T    | 7      | 386                          | 241                        | 0.62  |
| Insertion | T    | 8      | 105                          | 74                         | 0.70  |



|           |   |    |       |       |      |
|-----------|---|----|-------|-------|------|
| Insertion | T | 9  | 7     | 5     | 0.71 |
| Deletion  | A | 1  | 812   | 1337  | 1.65 |
| Deletion  | A | 2  | 6881  | 7574  | 1.10 |
| Deletion  | A | 3  | 6729  | 7181  | 1.07 |
| Deletion  | A | 4  | 3980  | 4623  | 1.16 |
| Deletion  | A | 5  | 2379  | 3073  | 1.29 |
| Deletion  | A | 6  | 1064  | 1373  | 1.29 |
| Deletion  | A | 7  | 286   | 395   | 1.38 |
| Deletion  | A | 8  | 70    | 92    | 1.31 |
| Deletion  | A | 9  | 8     | 11    | 1.38 |
| Deletion  | C | 1  | 598   | 760   | 1.27 |
| Deletion  | C | 2  | 19389 | 17103 | 0.88 |
| Deletion  | C | 3  | 9688  | 9989  | 1.03 |
| Deletion  | C | 4  | 2607  | 3276  | 1.26 |
| Deletion  | C | 5  | 577   | 796   | 1.38 |
| Deletion  | C | 6  | 102   | 146   | 1.43 |
| Deletion  | C | 7  | 18    | 26    | 1.44 |
| Deletion  | C | 8  | 1     | 3     | 3.00 |
| Deletion  | C | 10 | 1     | 2     | 2.00 |
| Deletion  | G | 1  | 553   | 732   | 1.32 |
| Deletion  | G | 2  | 19117 | 17946 | 0.94 |
| Deletion  | G | 3  | 9590  | 10686 | 1.11 |
| Deletion  | G | 4  | 2659  | 3515  | 1.32 |
| Deletion  | G | 5  | 636   | 871   | 1.37 |
| Deletion  | G | 6  | 105   | 152   | 1.45 |
| Deletion  | G | 7  | 24    | 31    | 1.29 |
| Deletion  | G | 8  | 5     | 6     | 1.20 |
| Deletion  | G | 9  | 1     | 1     | 1.00 |
| Deletion  | T | 1  | 783   | 1251  | 1.60 |
| Deletion  | T | 2  | 6894  | 7989  | 1.16 |
| Deletion  | T | 3  | 6633  | 7662  | 1.16 |
| Deletion  | T | 4  | 4067  | 5203  | 1.28 |
| Deletion  | T | 5  | 2290  | 3220  | 1.41 |
| Deletion  | T | 6  | 1019  | 1470  | 1.44 |
| Deletion  | T | 7  | 287   | 423   | 1.47 |
| Deletion  | T | 8  | 81    | 112   | 1.38 |
| Deletion  | T | 9  | 6     | 7     | 1.17 |

**Supplementary Table 4:** Breakdown of insertion and deletion errors in the Sequel II *E. coli* test set.
